# Supplementary material for: Impacts of Steel-Slag-Based Silicate Fertilizer on Soil Acidity and Silicon Availability and Metals-Immobilization in a Paddy Soil
Source: PLoS One. 2016 Dec 14;11(12):e0168163. doi: 10.1371/journal.pone.0168163 (PMC5156425; doi:10.1371/journal.pone.0168163)
Supplement: S3 Table — (XLS) [file pone.0168163.s003.xls]

## Sheet: Sheet1
Data for Fig. 3 Dry weight of rice organs (g/pot)
Treatment	Early rice				Early rice
	Grain	Straw	Grain	Straw	Grain	Straw	Grain	Straw
	average vale	stdev	average vale	stdev	average vale	stdev	average vale	stdev
CK	29.4	1.63	10.1	1.26	29.4	1.63	10.1	1.26
Si 1	30.8	3.33	10.3	0.71	30.8	3.33	10.3	0.71
Si 2	30.6	4.46	10.5	1.14	30.6	4.46	10.5	1.14
Si 3	31.9	2.13	10.7	1.05	31.9	2.13	10.7	1.05
Si 4	32.2	2.55	11.3	0.92	32.2	2.55	11.3	0.92
Si 5	32.9	3.41	11.5	1.14	32.9	3.41	11.5	1.14
