# Supplementary material for: Impacts of Steel-Slag-Based Silicate Fertilizer on Soil Acidity and Silicon Availability and Metals-Immobilization in a Paddy Soil
Source: PLoS One. 2016 Dec 14;11(12):e0168163. doi: 10.1371/journal.pone.0168163 (PMC5156425; doi:10.1371/journal.pone.0168163)
Supplement: S4 Table — (XLS) [file pone.0168163.s004.xls]

## Sheet: Sheet1
Data for Fig. 4 SiO2 content in rice straw (%)
Treatment	early rice		late rice
	average vale	stdev	average vale	stdev
CK	6.38	0.77	6.47	1.63
Si 1	6.19	0.99	6.74	0.94
Si 2	7.05	0.45	7.51	1.06
Si 3	7.82	0.57	8.43	0.72
Si 4	8.5	0.68	9.4	0.15
Si 5	9.82	0.98	10.3	1.25
