# Supplementary material for: Impacts of Steel-Slag-Based Silicate Fertilizer on Soil Acidity and Silicon Availability and Metals-Immobilization in a Paddy Soil
Source: PLoS One. 2016 Dec 14;11(12):e0168163. doi: 10.1371/journal.pone.0168163 (PMC5156425; doi:10.1371/journal.pone.0168163)
Supplement: S5 Table — A. Effect of steel slag fertilizer application on total Cd concentration in soil. B. Effect of steel slag fertilizer application on total Pb concentration in soil. (XLS) [file pone.0168163.s005.xls]

## Sheet: Sheet1
A Total Cd content in soil (mg kg-1 )
	early rice		late rice
Treatment	average vale	stdev	average vale	stdev
CK	0.389	0.0107	0.404	0.002
Si 1	0.379	0.007	0.395	0.015
Si 2	0.397	0.003	0.391	0.018
Si 3	0.395	0.001	0.387	0.014
Si 4	0.399	0.015	0.404	0.003
Si 5	0.392	0.005	0.395	0.027
B Total Pb content in soil (mg kg-1 )
	early rice		late rice
Treatment	average vale	stdev	average vale	stdev
CK	31.8	2.2	30.7	1
Si 1	31.3	1.5	30.2	1.7
Si 2	31.9	0.9	29.6	3.2
Si 3	31.5	2	30.5	1.2
Si 4	33.1	1.5	30.9	1.1
Si 5	33.2	2.2	31.8	2.7
